# Supplementary material for: La gestión de las ONG de desarrollo en su lucha por la supervivencia. Legitimidades, estructura y entornos
Source: Springer Nature journal article supplement (doi:10.1186/gb-2008-9-2-r43), 2013-12-12
Supplement: Additional file 1 [file gb-2008-9-2-r43-s1.pdf]

Table 1-suppl: Pea mutants phenotypic list

|                  | Major category        | Sub category | Sub sub category         | no.of families     |                    |    |
|------------------|-----------------------|--------------|--------------------------|--------------------|--------------------|----|
| 1                | Cotyledon             | Color        | yellow variegated        | 48                 |                    |    |
|                  |                       |              | yellow bright            | 25                 |                    |    |
|                  |                       |              | albino                   | 53                 |                    |    |
|                  |                       |              | dark                     | 5                  |                    |    |
|                  |                       | Shape        | green variegated         | 41                 |                    |    |
|                  |                       |              | curling                  | 26                 |                    |    |
|                  |                       |              | waxy                     | 6                  |                    |    |
| 2                | Plantlet arc          | Architecture | Bushy                    | 5                  |                    |    |
|                  |                       |              | Giant                    | 2                  |                    |    |
| 3                | Plant archite         | Architecture | compact                  | 120                |                    |    |
|                  |                       |              | giant with normal intern | 22                 |                    |    |
|                  |                       |              | miniature                | 119                |                    |    |
|                  |                       |              | long internodes          | 1                  |                    |    |
|                  |                       |              | giant with long internoc | 3                  |                    |    |
|                  |                       |              | compact at the top       | 1                  |                    |    |
|                  |                       |              | hyper compact            | 50                 |                    |    |
|                  |                       |              | Branching                | basal branching    | 94                 |    |
|                  |                       |              |                          | determinate growth | 14                 |    |
|                  |                       |              |                          | branching          | 85                 |    |
|                  |                       | 4            | Leaf                     | Color              | bushy              | 12 |
|                  |                       |              |                          |                    | vein/lam - veining | 20 |
|                  |                       |              |                          |                    | glossy             | 76 |
| dark green       | 38                    |              |                          |                    |                    |    |
| variegated       | 88                    |              |                          |                    |                    |    |
| pale green       | 325                   |              |                          |                    |                    |    |
| silver-argenteum | 45                    |              |                          |                    |                    |    |
| yellow           | 18                    |              |                          |                    |                    |    |
| Shape and        | upcurling             |              |                          | 108                |                    |    |
|                  | indented edge         |              |                          | 24                 |                    |    |
|                  | round                 |              |                          | 25                 |                    |    |
|                  | downcurling           |              |                          | 33                 |                    |    |
|                  | afila - tendrils only |              |                          | 2                  |                    |    |
| 5                | Stipule               | Size/Color/  | coneshaped at leaf base  | 20                 |                    |    |
|                  |                       |              | leaf ended by tendrils   | 17                 |                    |    |
|                  |                       |              | margin raised            | 8                  |                    |    |
|                  |                       |              | no tendril               | 1                  |                    |    |
|                  |                       |              | leaflets superimposed    | 7                  |                    |    |
|                  |                       |              | rhomboid-pointed         | 34                 |                    |    |
|                  |                       |              | distorted                | 64                 |                    |    |
|                  |                       |              | long tendrils            | 1                  |                    |    |
|                  |                       |              | multifoliate             | 43                 |                    |    |
|                  |                       |              | Appearance               | wilted             | 10                 |    |
|                  |                       |              |                          | spotted            | 1                  |    |
|                  |                       |              |                          | thick              | 11                 |    |
|                  |                       |              |                          | waxy               | 2                  |    |
| crinkled         | 53                    |              |                          |                    |                    |    |
| Size             | stunted               | 144          |                          |                    |                    |    |
|                  | mottled               | 32           |                          |                    |                    |    |
|                  | narrow                | 39           |                          |                    |                    |    |
|                  |                       |              | medium                   | 36                 |                    |    |
|                  |                       |              | very narrow              | 6                  |                    |    |
|                  |                       |              | indented                 | 30                 |                    |    |

|   |         |             |                           |      |
|---|---------|-------------|---------------------------|------|
|   |         |             | pointed                   | 3    |
|   |         |             | narrow                    | 10   |
|   |         |             | round                     | 2    |
|   |         |             | asymmetric                | 3    |
|   |         |             | large                     | 4    |
|   |         |             | distorted                 | 14   |
|   |         |             | silver-argenteum          | 2    |
|   |         |             | white variegated          | 9    |
| 6 | Petiole | Petiole     | short                     | 4    |
|   |         |             | absence                   | 2    |
| 7 | Stem    | Stem size   | extrem dwarf              | 422  |
|   |         |             | dwarf(1/4-2/3 of n)       | 1025 |
|   |         | Shape       | thin                      | 32   |
|   |         |             | fasciated                 | 4    |
| 8 | Flowers | Flower mor  | abnormal petals           | 3    |
|   |         |             | abnormal all              | 18   |
|   |         |             | cauliflower type inflore: | 3    |
|   |         | Flowering t | early flowering           | 4    |
|   |         | Reproducti  | sterile flowers           | 10   |
|   |         |             | no flower                 | 2    |
| 9 | Seed    | Seed color  | beige                     | 1    |
|   |         |             | pale                      | 1    |
|   |         | Shape       | wrinkled                  | 1    |
|   |         |             | crackled seed coat        | 1    |
|   |         |             | extremely wrinkled        | 2    |
|   |         | Size        | large                     | 17   |
|   |         |             | small                     | 49   |
